# Supplementary material for: The impact of growth at elevated [CO2] on stomatal anatomy and behavior differs between wheat species and cultivars
Source: PubMed Central journal article supplement (PMC10134898; doi:10.1093/jxb/erad011), 2023-01-12
Supplement: erad011_suppl_supplementary_material.pdf [file erad011_suppl_supplementary_material.pdf]

## Supplementary Figures

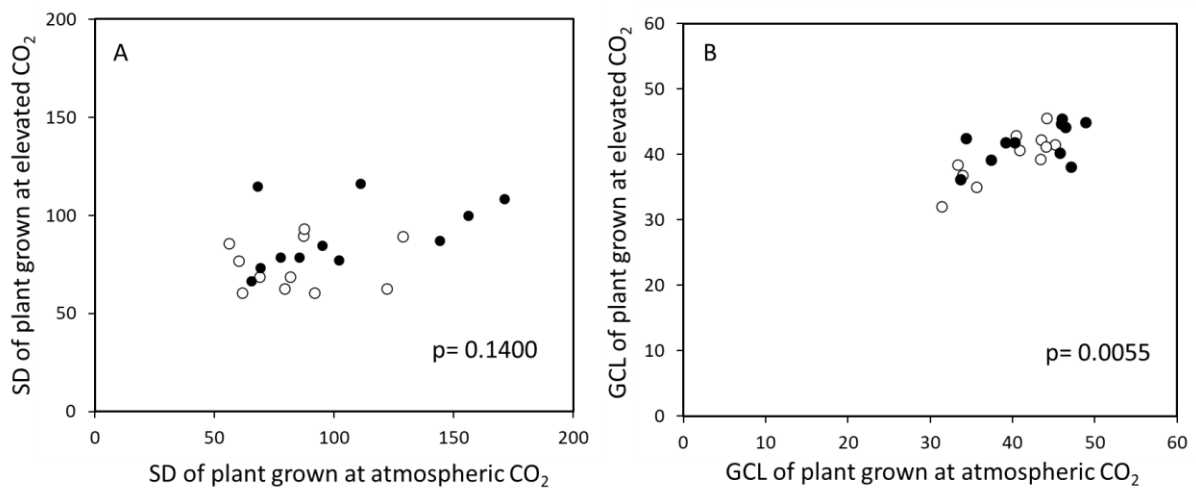

**Supplementary Figure 1.** Correlations between (A) averaged (n = 5-11) SD of for 11 wheat species/cultivar grown at atmospheric CO<sub>2</sub> and elevated CO<sub>2</sub> and (B) averaged CGL of for 11 wheat species/cultivar grown at atmospheric CO<sub>2</sub> and elevated CO<sub>2</sub>. Open circles represent AB SD and closed circle AD SD. P value from t test (n = 11).

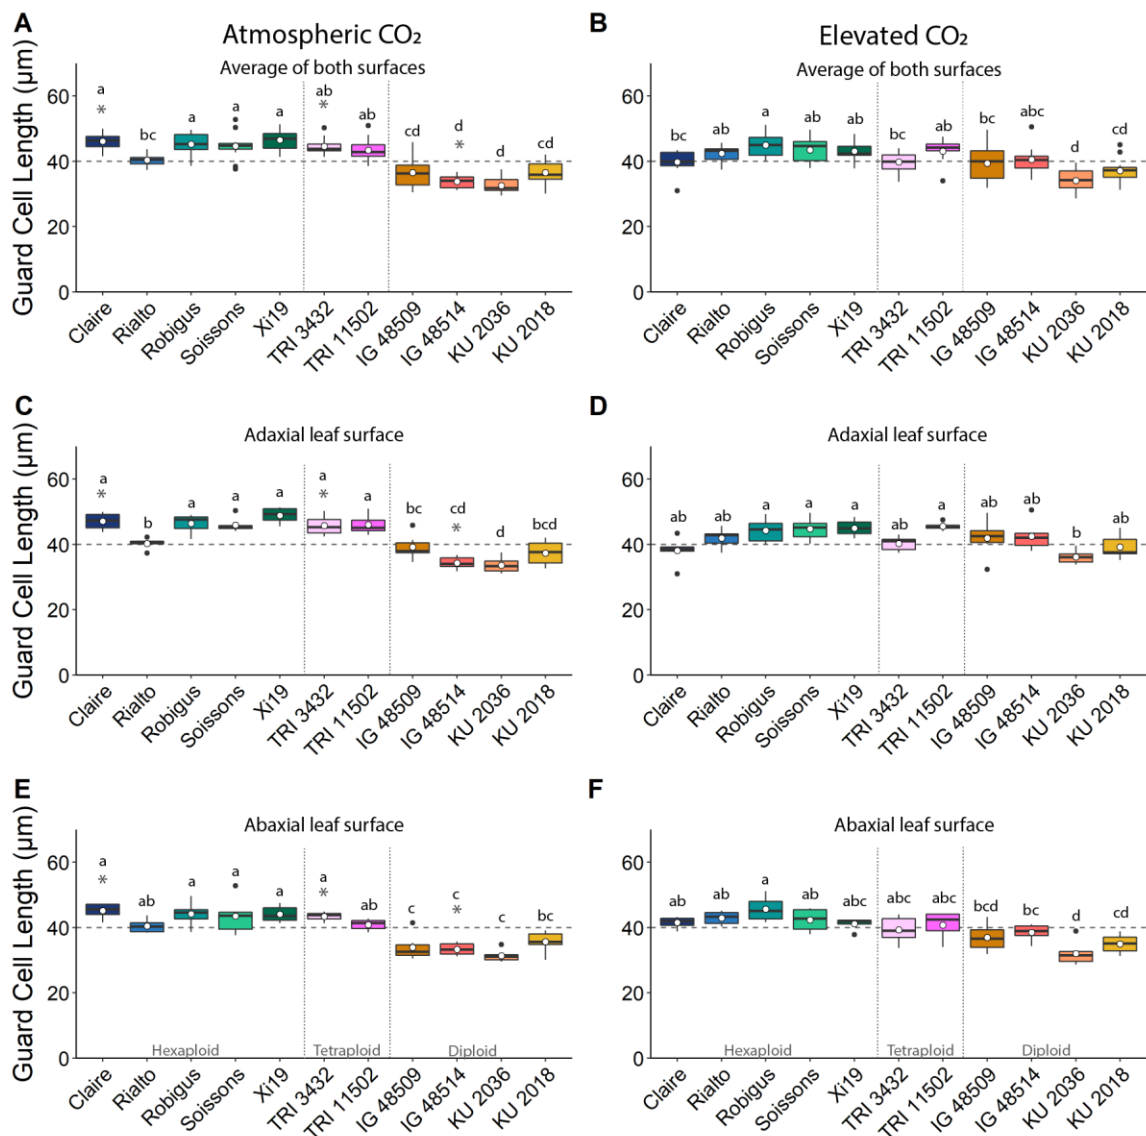

**Supplementary Figure 2.** Mean (white dot) and variation (box and whisker plots displaying distribution of biological replicates) of flag leaf guard cell length ( $\mu\text{m}$ ), calculated from the mean of both leaf surfaces (A and B), adaxial (C and D) and abaxial (E and F) leaf surfaces for 11 wheat species grown at atmospheric CO<sub>2</sub> ( $\sim 408$  ppm; A, C and E) and elevated CO<sub>2</sub> ( $\sim 800$  ppm; B, D and F). Different letters within each graph represent statistically significant differences ( $P < 0.05$ ) between means using the results of a Tukey test following a two-way ANOVA. Dashed line represents mean guard cell length of specific CO<sub>2</sub> treatment and leaf surface. Dotted lines separate wheat by ploidy. To test the effect of growth at elevated [CO<sub>2</sub>] on guard cell length, a t-test with a Bonferroni-Hochberg end correction ( $n = 6$ ) was used to compare individual wheat line means, with grey stars indicating significant differences ( $P < 0.05$ ).

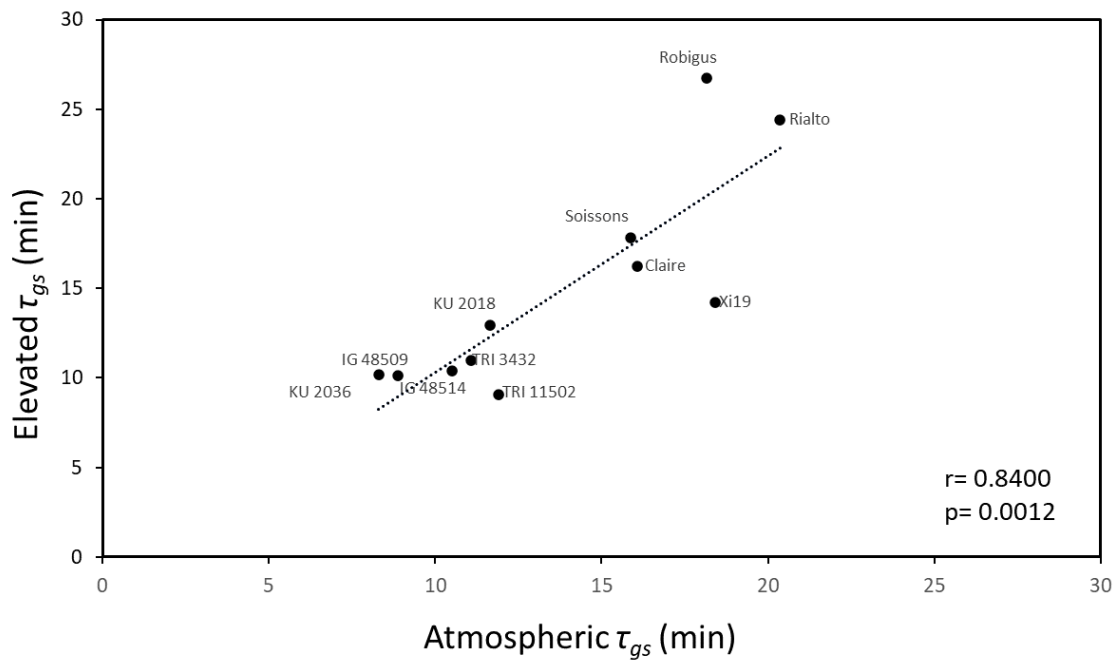

**Supplementary Figure 3.** Correlations between Time constant for stomatal opening ( $\tau_{gs}$  (min)) for each species, for 11 wheat species/cultivar grown at atmospheric  $\text{CO}_2$  ( $\sim 408$  ppm; A, B & C) and elevated  $\text{CO}_2$  ( $\sim 800$  ppm; B, C & D). Black dotted line represents the trend between the two variables. Pearson's correlation  $r$  coefficient and  $p$  value from  $t$  test ( $n = 5-7$ ).

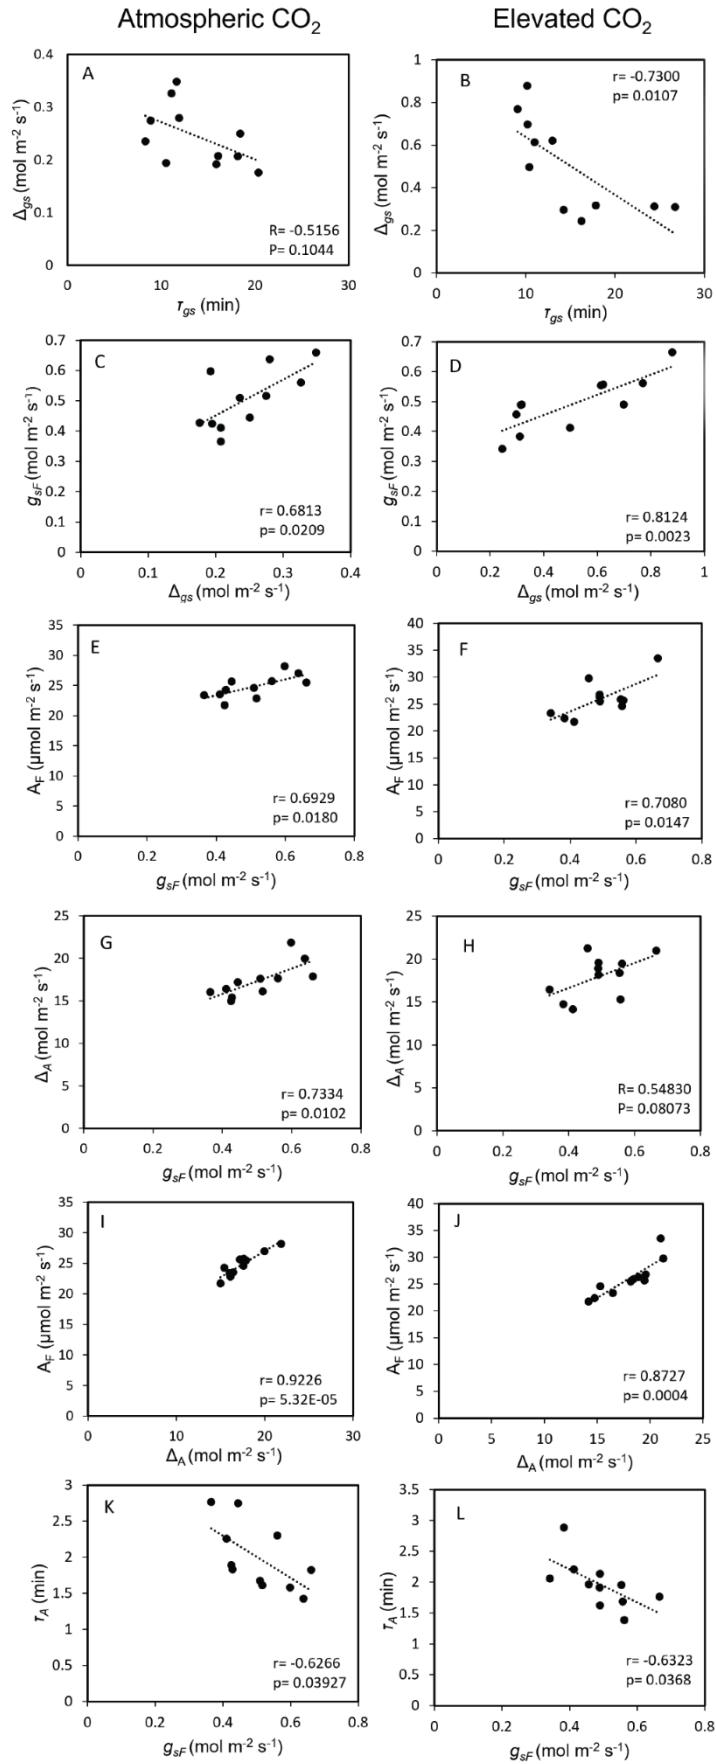

**Supplementary Figure 4.** Correlation between 11 wheat species/cultivars grown at atmospheric CO<sub>2</sub> (~ 408 ppm; A, C, E, G, I) and elevated CO<sub>2</sub> (~ 800 ppm; B, D, F, H, J). Time constant for light saturated carbon assimilation ( $\tau_A$  (mins)), final light saturated carbon assimilation rate ( $A_F$  ( $\mu\text{mol m}^{-2} \text{s}^{-1}$ )) after a step increase in light intensity from 100 to 1000  $\mu\text{mol m}^{-2} \text{s}^{-1}$  PPFD, the difference in  $A$  ( $\Delta A$  ( $\mu\text{mol m}^{-2} \text{s}^{-1}$ )) between 100 and 1000  $\mu\text{mol m}^{-2} \text{s}^{-1}$  PPFD, time constant for stomatal opening ( $\tau_{gs}$  (mins)), final stomatal conductance value ( $g_{sF}$  ( $\text{mol m}^{-2} \text{s}^{-1}$ )) after a step increase in light intensity from 100 to 1000  $\mu\text{mol m}^{-2} \text{s}^{-1}$  PPFD and the difference in  $g_s$  ( $\Delta g_s$  ( $\text{mol m}^{-2} \text{s}^{-1}$ )) between 100 and 1000  $\mu\text{mol m}^{-2} \text{s}^{-1}$  PPFD. Black dotted line represents the trend in the data between the two variables. Pearson's correlation  $r$  coefficient and  $p$  value from  $t$  test ( $n = 5-7$ ).

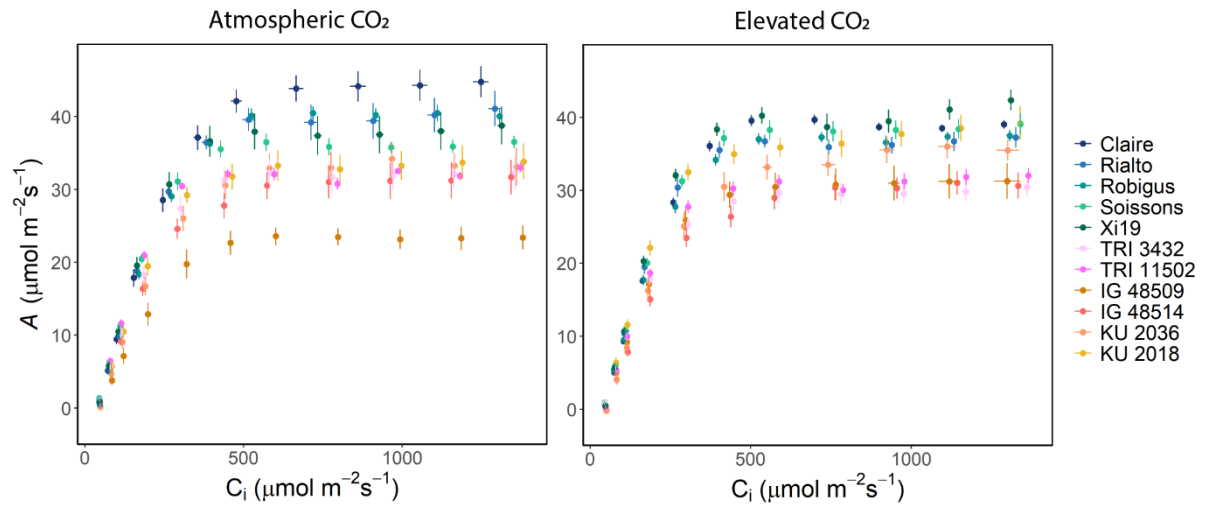

**Supplementary Figure 5.** The response of net CO<sub>2</sub> assimilation ( $A$ ) to intercellular [CO<sub>2</sub>] ( $C_i$ ) between 50 and 1500  $\mu\text{mol m}^{-2} \text{s}^{-1}$ , under saturating PPFD ( $1500 \mu\text{mol m}^{-2} \text{s}^{-1}$ ), for 11 wheat species grown at atmospheric CO<sub>2</sub> ( $\sim 408$  ppm; A) and elevated CO<sub>2</sub> ( $\sim 800$  ppm; B). Error bars represent mean  $\pm$  SE ( $n = 5-7$ ).

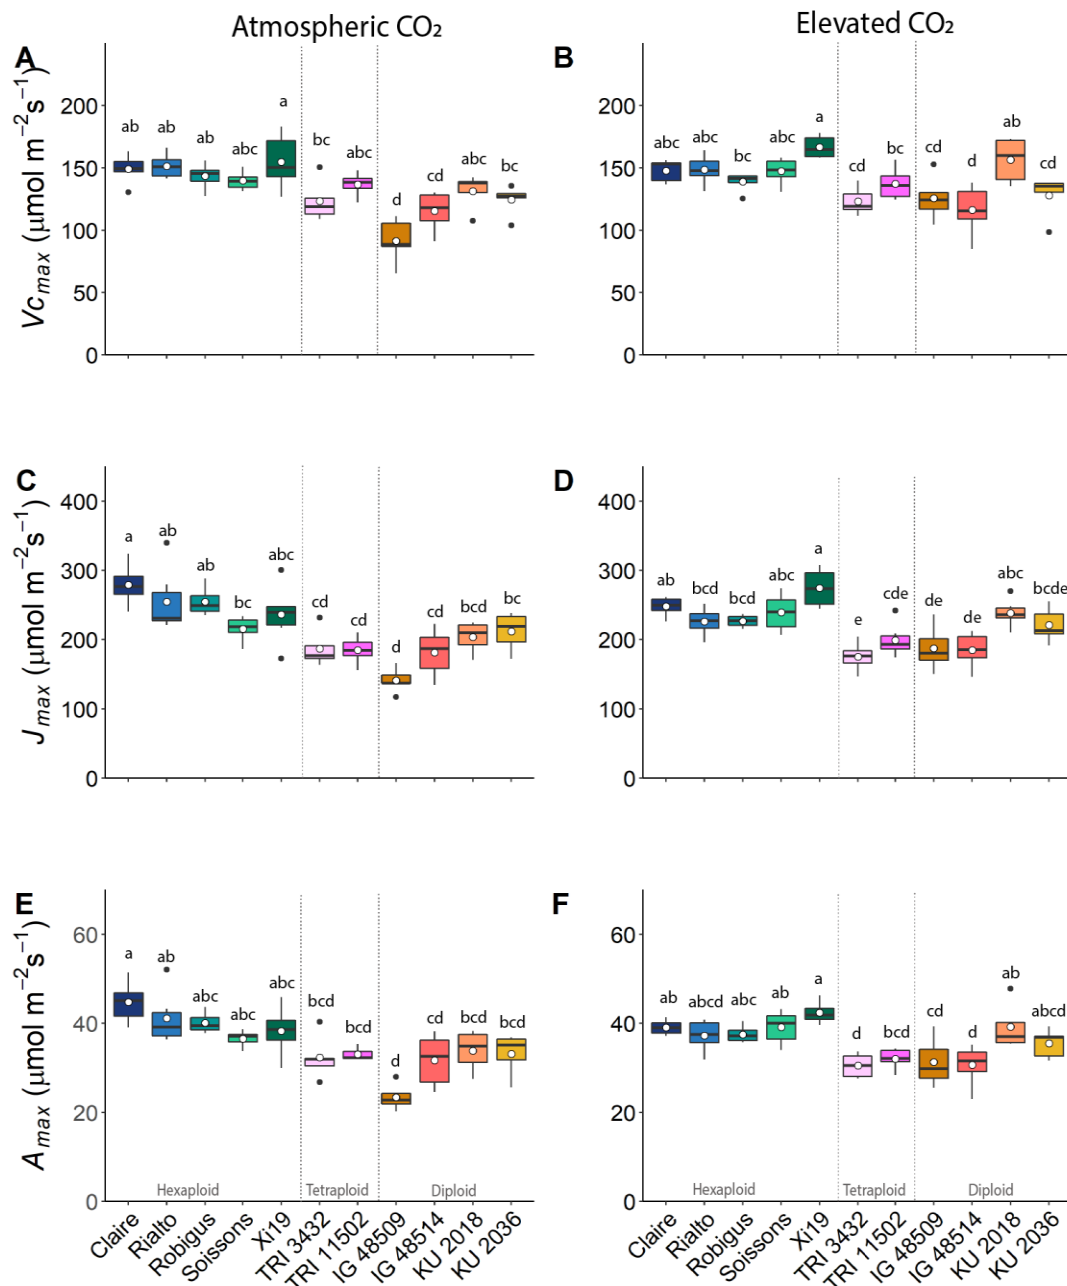

**Supplementary Figure 6.** Photosynthetic capacity, derived from  $A/C_i$  response of the 11 wheat species grown at atmospheric  $\text{CO}_2$  (~408 ppm; A, C and E) and elevated  $\text{CO}_2$  (~800 ppm; B, D and F). The maximum RuBP saturated rate of carboxylation ( $V_{c,max}$  ( $\mu\text{mol m}^{-2}\text{s}^{-1}$ ); A & B), the rate of RuBP regeneration ( $J_{max}$  ( $\mu\text{mol m}^{-2}\text{s}^{-1}$ ); C & D) and the light and  $\text{CO}_2$  saturated rate of photosynthesis ( $A_{max}$  ( $\mu\text{mol m}^{-2}\text{s}^{-1}$ ); E and F). Dotted lines separate wheat by ploidy. Different letters within each graph represent statistically significant differences ( $P < 0.05$ ) between means using the results of a Tukey test following a two-way ANOVA.

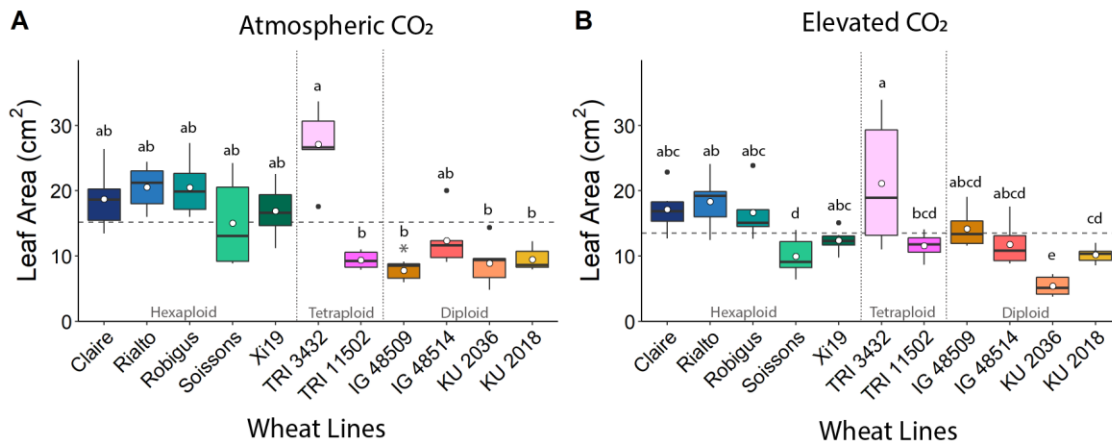

**Supplementary Figure 7.** Mean (white dot) and variation (box and whisker plots displaying distribution of biological replicates) of flag leaf area (cm<sup>2</sup>) for 11 wheat species grown at atmospheric CO<sub>2</sub> (~ 408 ppm; A) and elevated CO<sub>2</sub> (~ 800 ppm; B). Different letters within each graph represent statistically significant differences ( $P < 0.05$ ) between means using the results of a Tukey test following a two-way ANOVA. Dashed line represents mean leaf area of specific CO<sub>2</sub> treatment and leaf surface. Dotted lines separate wheat by ploidy. To test the effect of growth at elevated [CO<sub>2</sub>] on leaf area, a t-test with a Bonferroni-Hochberg end correction ( $n = 6$ ) was used to compare individual wheat line means, with grey stars indicating significant differences ( $P < 0.05$ ).



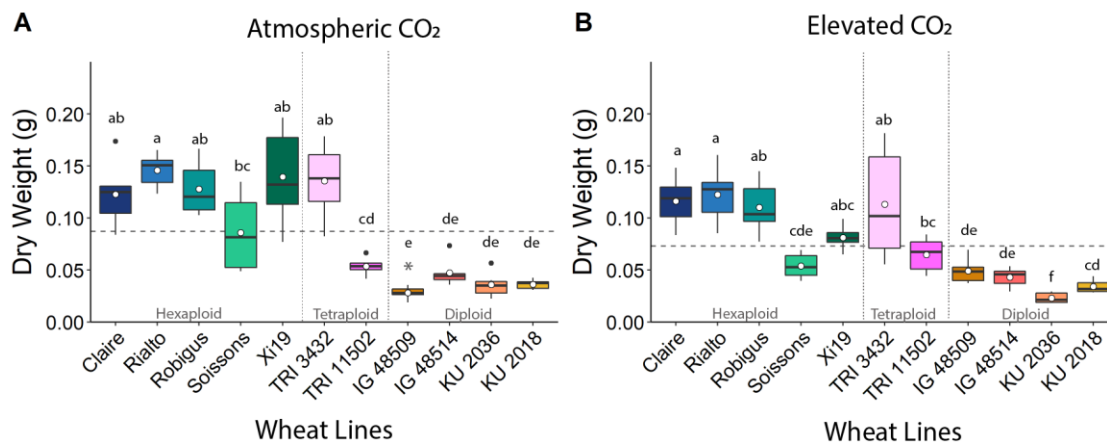

**Supplementary Figure 8.** Mean (white dot) and variation (box and whisker plots displaying distribution of biological replicates) of flag leaf dry weight (g) for 11 wheat species grown at atmospheric CO<sub>2</sub> (~ 408 ppm; A) and elevated CO<sub>2</sub> (~ 800 ppm; B). Different letters within each graph represent statistically significant differences ( $P < 0.05$ ) between means using the results of a Tukey test following a two-way ANOVA. Dashed line represents mean dry weight of specific CO<sub>2</sub> treatment and leaf surface. Dotted lines separate wheat by ploidy. To test the effect of growth at elevated [CO<sub>2</sub>] on dry weight, a t-test with a Bonferroni-Hochberg end correction ( $n = 6$ ) was used to compare individual wheat line means, with grey stars indicating significant differences ( $P < 0.05$ ).

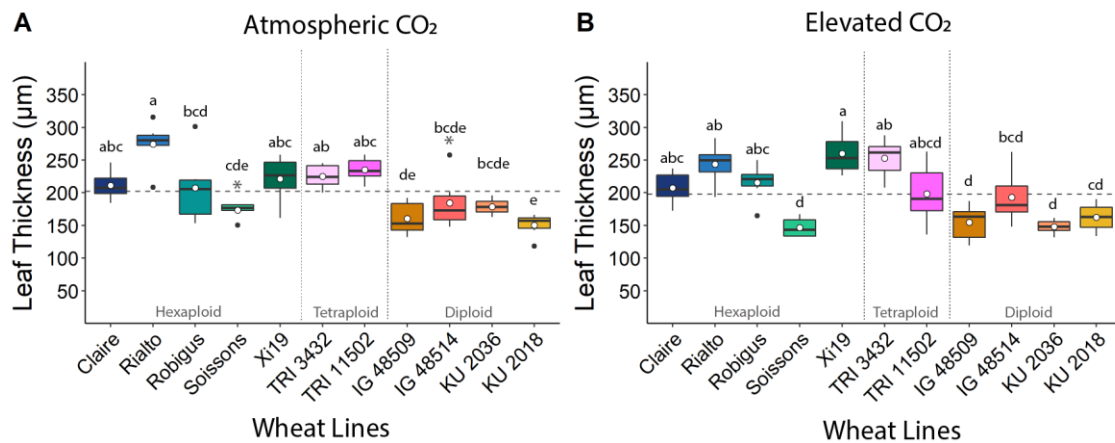

**Supplementary Figure 9.** Mean (white dot) and variation (box and whisker plots displaying distribution of biological replicates) of flag leaf thickness ( $\mu\text{m}$ ) for 11 wheat species grown at atmospheric  $\text{CO}_2$  ( $\sim 408$  ppm; A) and elevated  $\text{CO}_2$  ( $\sim 800$  ppm; B). Different letters within each graph represent statistically significant differences ( $P < 0.05$ ) between means using the results of a Tukey test following a two-way ANOVA. Dashed line represents mean leaf thickness of specific  $\text{CO}_2$  treatment and leaf surface. Dotted lines separate wheat by ploidy. To test the effect of growth at elevated  $[\text{CO}_2]$  on leaf thickness, a t-test with a Bonferroni-Hochberg end correction ( $n = 6$ ) was used to compare individual wheat line means, with grey stars indicating significant differences ( $P < 0.05$ )
